# Supplementary material for: The Effects of a Cardiac Rehabilitation Program on Endothelial Progenitor Cells and Inflammatory Profile in Patients with Chronic Heart Failure of Different Severity
Source: MDPI journal article supplement (doi:10.3390/jcm12206592), 2023-10-18
Supplement: s1 [file s1]

**Supplementary Table S1.** Correlations between the numeric difference of the mobilization of endothelial cellular populations and the numeric difference of other cardiopulmonary exercise testing or blood sample variables after the cardiac rehabilitation program

|                                                                              | Peak VO <sub>2</sub>     | Predicted peak VO <sub>2</sub> | VE/VCO <sub>2</sub> slope | Peak WR                  | CRP                      | IL-6                     | IL-10                    | VEGF                                   |
|------------------------------------------------------------------------------|--------------------------|--------------------------------|---------------------------|--------------------------|--------------------------|--------------------------|--------------------------|----------------------------------------|
| CD34 <sup>+</sup> /CD45 <sup>-</sup> /CD133 <sup>+</sup>                     | 0.063 (CC)<br>p = 0.686  | 0.042 (CC)<br>p = 0.786        | 0.038 (CC)<br>p = 0.807   | -0.008 (CC)<br>p = 0.957 | 0.002 (CC)<br>p = 0.991  | -0.034 (CC)<br>p = 0.827 | -0.149 (CC)<br>p = 0.336 | 0.100 (CC)<br>p = 0.518                |
| CD34 <sup>+</sup> /CD45 <sup>-</sup> /CD133 <sup>+</sup> /VEGFR <sub>2</sub> | -0.273 (CC)<br>p = 0.073 | -0.237 (CC)<br>p = 0.121       | -0.007 (CC)<br>p = 0.967  | -0.165 (CC)<br>p = 0.284 | -0.090 (CC)<br>p = 0.561 | -0.168 (CC)<br>p = 0.276 | -0.067 (CC)<br>p = 0.667 | 0.029 (CC)<br>p = 0.851                |
| CD34 <sup>+</sup> /CD133 <sup>+</sup> /VEGFR <sub>2</sub>                    | -0.167 (CC)<br>p = 0.280 | -0.196 (CC)<br>p = 0.203       | 0.007 (CC)<br>p = 0.962   | -0.059 (CC)<br>p = 0.702 | 0.284 (CC)<br>p = 0.061  | -0.264 (CC)<br>p = 0.083 | -0.154 (CC)<br>p = 0.317 | -0.115 (CC)<br>p = 0.455               |
| CD34 <sup>+</sup> /CD45 <sup>-</sup> /CD133 <sup>-</sup>                     | -0.047 (CC)<br>p = 0.761 | -0.012 (CC)<br>p = 0.938       | 0.170 (CC)<br>p = 0.270   | 0.085 (CC)<br>p = 0.584  | -0.059 (CC)<br>p = 0.705 | -0.080 (CC)<br>p = 0.607 | -0.192 (CC)<br>p = 0.212 | <b>-0.309 (CC)</b><br><b>p = 0.041</b> |
| CD34 <sup>+</sup> /CD45 <sup>-</sup> /CD133 <sup>-</sup> /VEGFR <sub>2</sub> | 0.244 (CC)<br>p = 0.111  | 0.271 (CC)<br>p = 0.075        | -0.018 (CC)<br>p = 0.906  | 0.251 (CC)<br>p = 0.101  | 0.288 (CC)<br>p = 0.058  | 0.039 (CC)<br>p = 0.801  | 0.028 (CC)<br>p = 0.856  | 0.120 (CC)<br>p = 0.436                |

CR, cardiac rehabilitation; VO<sub>2</sub>, oxygen uptake; VE, minute ventilation; VCO<sub>2</sub>, carbon dioxide output; WR, work rate; CRP, C-reactive protein; IL, interleukin; VEGF, vascular endothelial growth factor.

**Supplementary Table S2.** Correlations between the percentage difference of the mobilization of endothelial cellular populations and the percentage difference of other cardiopulmonary exercise testing or blood sample variables after the cardiac rehabilitation program

|                                                                              | Peak VO <sub>2</sub>                  | Predicted peak VO <sub>2</sub>        | VE/VCO <sub>2</sub> slope | Peak WR                               | CRP                      | IL-6                     | IL-10                    | VEGF                     |
|------------------------------------------------------------------------------|---------------------------------------|---------------------------------------|---------------------------|---------------------------------------|--------------------------|--------------------------|--------------------------|--------------------------|
| CD34 <sup>+</sup> /CD45 <sup>-</sup> /CD133 <sup>+</sup>                     | -0.018 (CC)<br>p = 0.906              | -0.057 (CC)<br>p = 0.716              | 0.263 (CC)<br>p = 0.084   | -0.020 (CC)<br>p = 0.898              | -0.030 (CC)<br>p = 0.849 | 0.014 (CC)<br>p = 0.926  | -0.006 (CC)<br>p = 0.968 | 0.273 (CC)<br>p = 0.073  |
| CD34 <sup>+</sup> /CD45 <sup>-</sup> /CD133 <sup>+</sup> /VEGFR <sub>2</sub> | -0.177 (CC)<br>p = 0.250              | -0.148 (CC)<br>p = 0.338              | 0.105 (CC)<br>p = 0.496   | 0.041 (CC)<br>p = 0.791               | -0.085 (CC)<br>p = 0.583 | -0.084 (CC)<br>p = 0.588 | -0.085 (CC)<br>p = 0.582 | 0.046 (CC)<br>p = 0.766  |
| CD34 <sup>+</sup> /CD133 <sup>+</sup> /VEGFR <sub>2</sub>                    | 0.255 (CC)<br>p = 0.095               | 0.242 (CC)<br>p = 0.113               | -0.042 (CC)<br>p = 0.784  | 0.168 (CC)<br>p = 0.276               | 0.161 (CC)<br>p = 0.296  | -0.142 (CC)<br>p = 0.359 | -0.164 (CC)<br>p = 0.288 | -0.162 (CC)<br>p = 0.293 |
| CD34 <sup>+</sup> /CD45 <sup>-</sup> /CD133 <sup>-</sup>                     | -0.136 (CC)<br>p = 0.378              | -0.103 (CC)<br>p = 0.506              | 0.197 (CC)<br>p = 0.200   | 0.010 (CC)<br>p = 0.951               | 0.044 (CC)<br>p = 0.774  | 0.007 (CC)<br>p = 0.963  | -0.192 (CC)<br>p = 0.212 | -0.261 (CC)<br>p = 0.088 |
| CD34 <sup>+</sup> /CD45 <sup>-</sup> /CD133 <sup>-</sup> /VEGFR <sub>2</sub> | <b>0.402 (CC)</b><br><b>p = 0.007</b> | <b>0.379 (CC)</b><br><b>p = 0.011</b> | -0.017 (CC)<br>p = 0.914  | <b>0.333 (CC)</b><br><b>p = 0.027</b> | 0.073 (CC)<br>p = 0.638  | 0.190 (CC)<br>p = 0.218  | 0.206 (CC)<br>p = 0.179  | 0.139 (CC)<br>p = 0.369  |

CR, cardiac rehabilitation; VO<sub>2</sub>, oxygen uptake; VE, minute ventilation; VCO<sub>2</sub>, carbon dioxide output; WR, work rate; CRP, C-reactive protein; IL, interleukin; VEGF, vascular endothelial growth factor.
